# Supplementary material
Source: PubMed Central journal article supplement (PMC4356183)
Supplement: Supp_Figure1.pdf [file Supp_Figure1.pdf]

## Supplementary Data

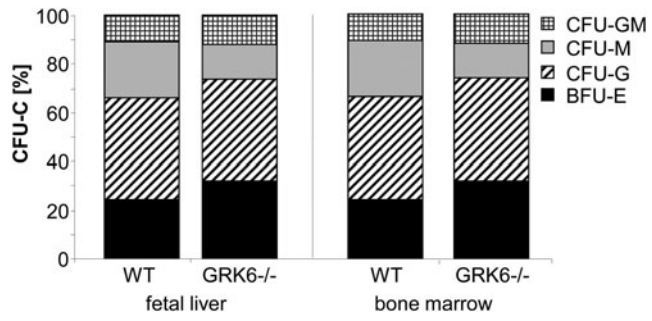

**SUPPLEMENTARY FIG. S1.** Lineage distribution of myeloid progenitor cells. Relative distribution of CFU-C lineages in fetal liver and bone marrow ( $n=2-5$ ). CFU-C, colony-forming units culture.
