# Supplementary material
Source: PubMed Central journal article supplement (PMC4356183)
Supplement: Supp_Figure2.pdf [file Supp_Figure2.pdf]

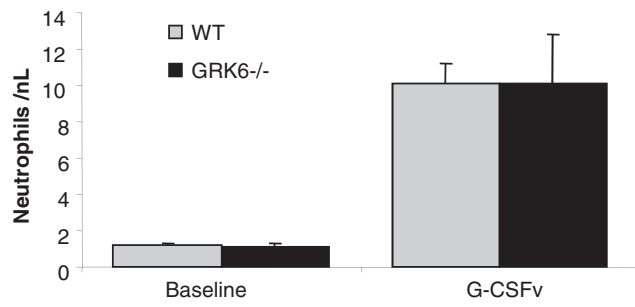

**SUPPLEMENTARY FIG. S2.** Neutrophil mobilization by granulocyte colony-stimulating factor (G-CSF). Neutrophils in peripheral blood in mice treated with G-CSF for 5 days ( $n=4-5$  per group).
