# Supplementary material
Source: PubMed Central journal article supplement (PMC4356183)
Supplement: Supp_Figure3.pdf [file Supp_Figure3.pdf]

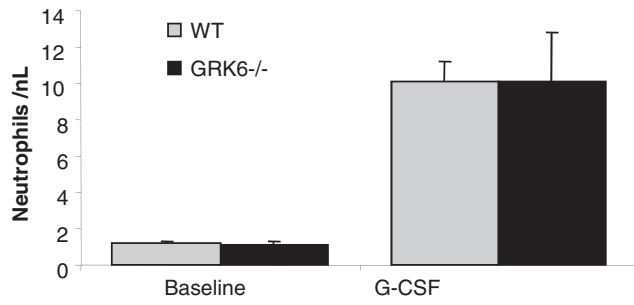

**SUPPLEMENTARY FIG. S3.** Hemolytic anemia. Recovery of splenectomized mice after phenylhydrazine treatment ( $n=3$  per group).
