# Supplementary material
Source: PubMed Central journal article supplement (PMC4356183)
Supplement: Supp_Figure4.pdf [file Supp_Figure4.pdf]

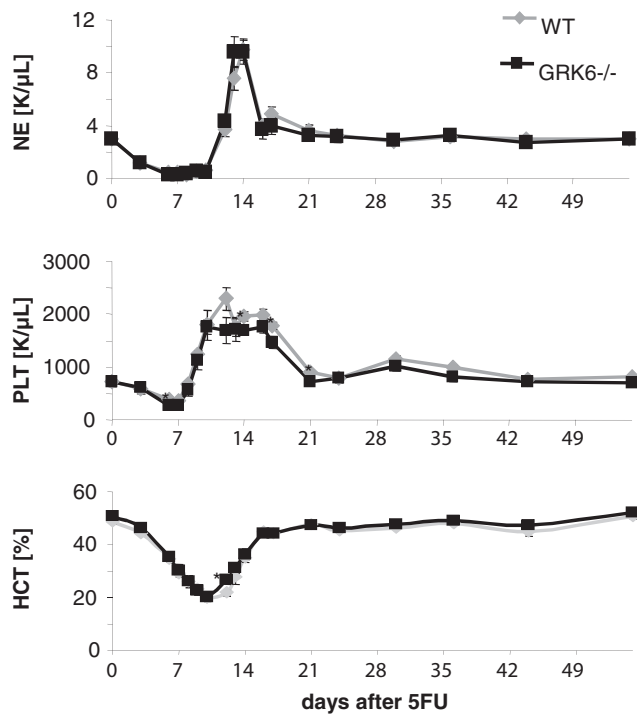

**SUPPLEMENTARY FIG. S4.** Recovery from chemotherapy insult. Mice received a single injection of 5-fluorouracil and hematopoietic regeneration was followed over time. *Asterisks* indicate significant differences between GRK6<sup>-/-</sup> and WT ( $P < 0.05$ ). WT, wild-type.
